# Supplementary figures and images for: Meiotic Transmission of an In Vitro–Assembled Autonomous Maize Minichromosome
Source: PLOS journal article supplement (doi:10.1371/journal.pgen.0030179), 2007-10-16

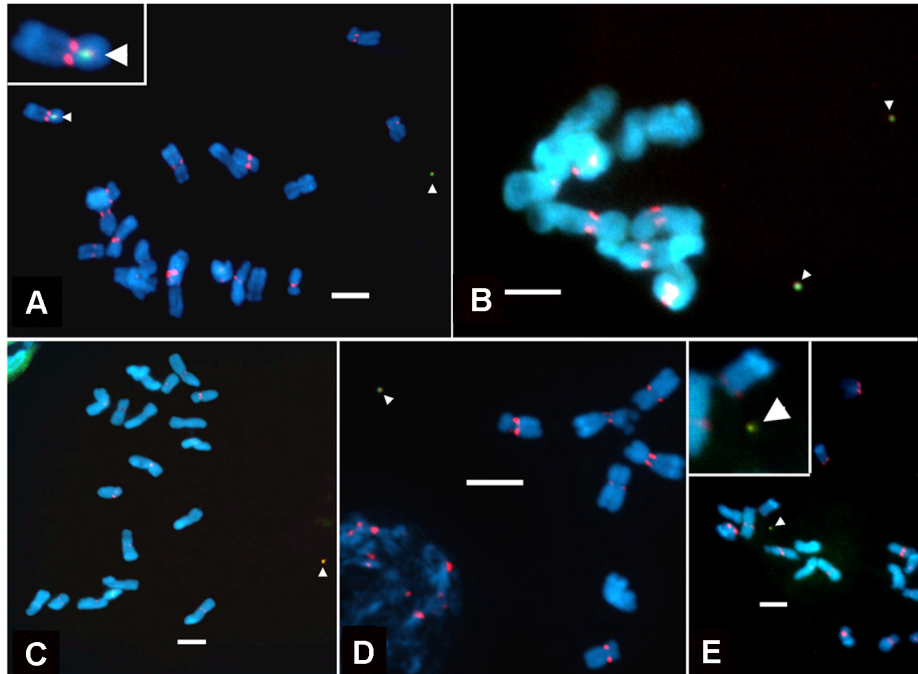

Figure S1

Supplement: S1 (10.1371/journal.pgen.0030179.s001) [file journal.pgen.0030179.sg001.pdf › journal.pgen.0030179.sg001.pdf]
